# Supplementary material
Source: PubMed Central journal article supplement (PMC3624542)
Supplement: JB.02104-12_zjb999092500so1.pdf [file JB.02104-12_zjb999092500so1.pdf]

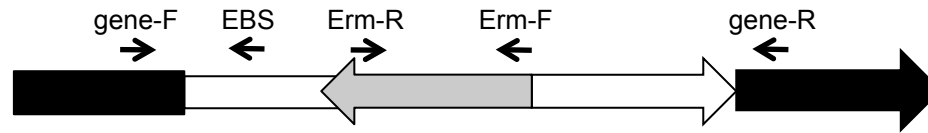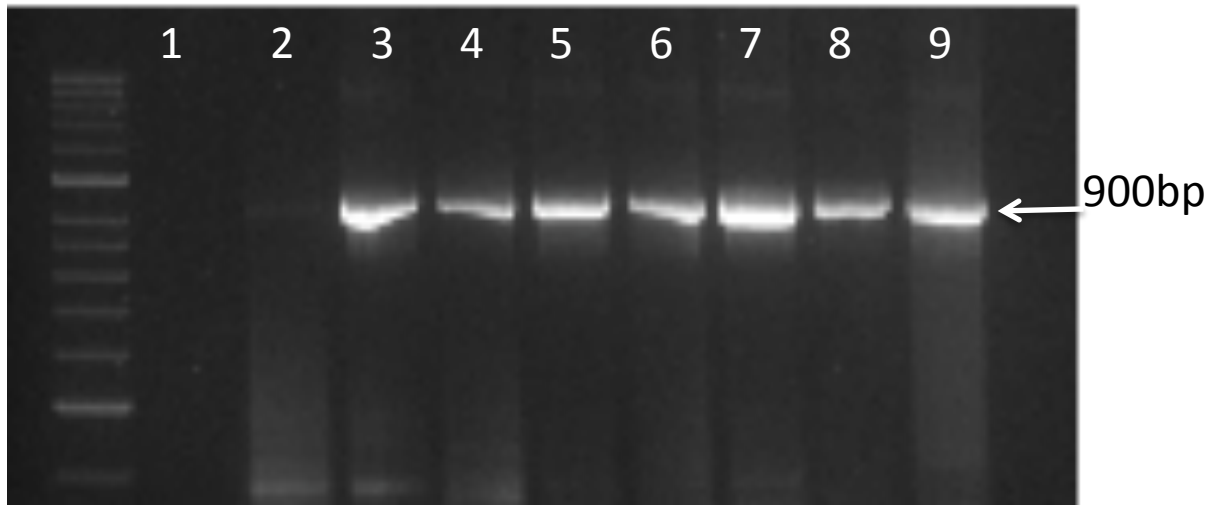

**Supplementary Figure 1A:** PCR using ErmRAM primers Erm-F and Erm-R with no template (1) and DNA extracts from 630 $\Delta$ erm (2) and *cotA::CT555a* (3), *cotB::CT329a* (4), *cotCB::CT220s* (5), *cotD::CT302s* (6), *cotE::CT220s* (7), *cotE::CT1203s* (8) and *sodA::CT394s* (9).

| ErmRAM primers  | Sequence 5'-3'                    |
|-----------------|-----------------------------------|
| Forward (Erm-F) | ACGCGTTATATTGATAAAAATAATAATAGTGGG |
| Reverse (Erm-R) | ACGCGTGCGACTCATAGAATTATTCCTCCCG   |

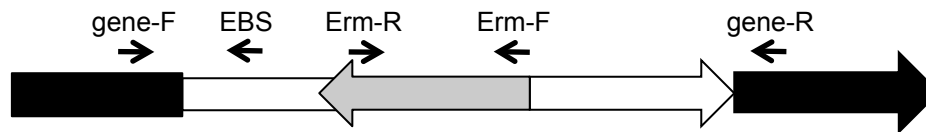

A. *cotA*::CT555

B. *cotB*::CT329

C. *cotCB*::CT220

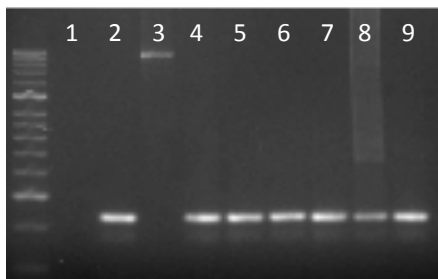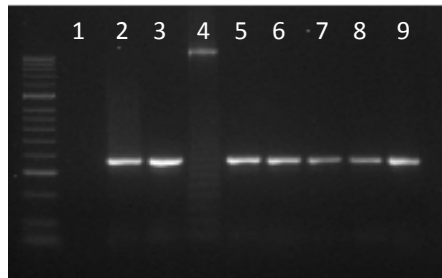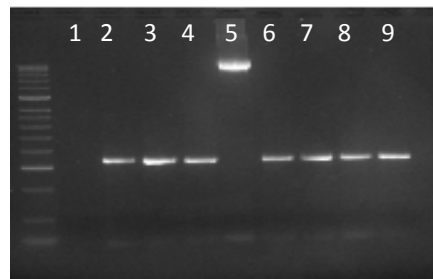

D. *cotD*::CT302

E. *cotE*::CT220

F. *cotE*::CT1203

G. *sodA*::CT394

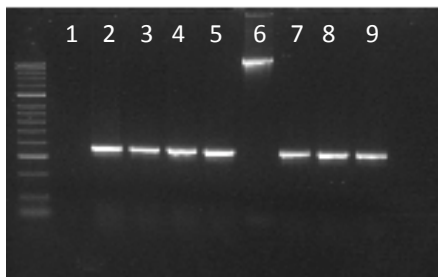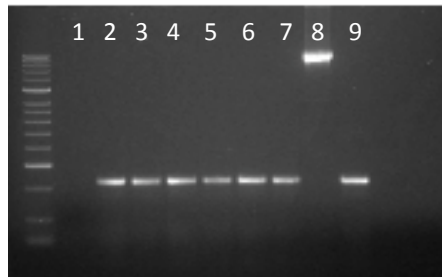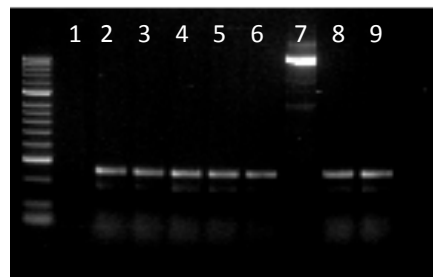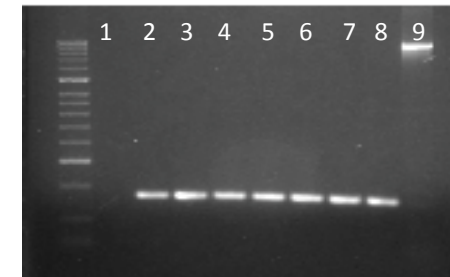

**Supplementary Figure 1B:** PCR using primer gene-F and gene-R, targeting the insertion site, with no template (1) and DNA extracts from the 630 $\Delta$ *erm* (2) and *cotA*::CT555*a* (3), *cotB*::CT329*a* (4), *cotCB*::CT220*s* (5), *cotD*::CT302*s* (6), *cotE*::CT220*s* (7), *cotE*::CT1203*s* (8) and *sodA*::CT394*s* (9). Primer targeting *cotA* are shown in A, targeting *cotB* (B), *cotCB* (C), *cotD* (D), *cotE*(N) (E), *cotE*(C) (F) and *sodA* (G). (Primer sequences given on next page).

| gene         | primer             | 5'-3' sequence           |
|--------------|--------------------|--------------------------|
|              |                    |                          |
| <i>cotA</i>  | CotA-clostron-F    | TTCCTCCTACGATAGACCTTGG   |
|              | CotA-clostron-R    | GCAATCATCACAATCGCAGT     |
| <i>cotB</i>  | CotB-clostron-F    | CAGGGATAGAAATAAACAAAAAC  |
|              | CotB-clostron-R    | GGGGTCTAGTAATCCTCTCATA   |
| <i>cotCB</i> | CotC-clostron-F    | TAACATAAGACAAGCAGACC     |
|              | CotC-clostron-R    | ATCGCCAAAGACATTA         |
| <i>cotD</i>  | CotD-clostron-F    | CCCGTAACCGATTTACATGA     |
|              | CotD-clostron-R    | CCCGTAACCGATTTACATGA     |
| <i>cotN</i>  | CotE(N)-clostron-F | CACATCCTGGTGATTTTACACC   |
|              | CotE(N)-clostron-R | TGCCGTATAACTTGGCAATTC    |
| <i>cotEC</i> | CotE(C)-clostron-F | AACAGACCCATACAATCCAATAGT |
|              | CotE(C)-clostron-R | CTCCCCAACCTCCAATAGC      |
| <i>sodA</i>  | SodA-clostron-F    | CCCAACCAGAACCAAAGACA     |
|              | SodA-clostron-R    | GAAATAATGCAGGTGGAGCTT    |

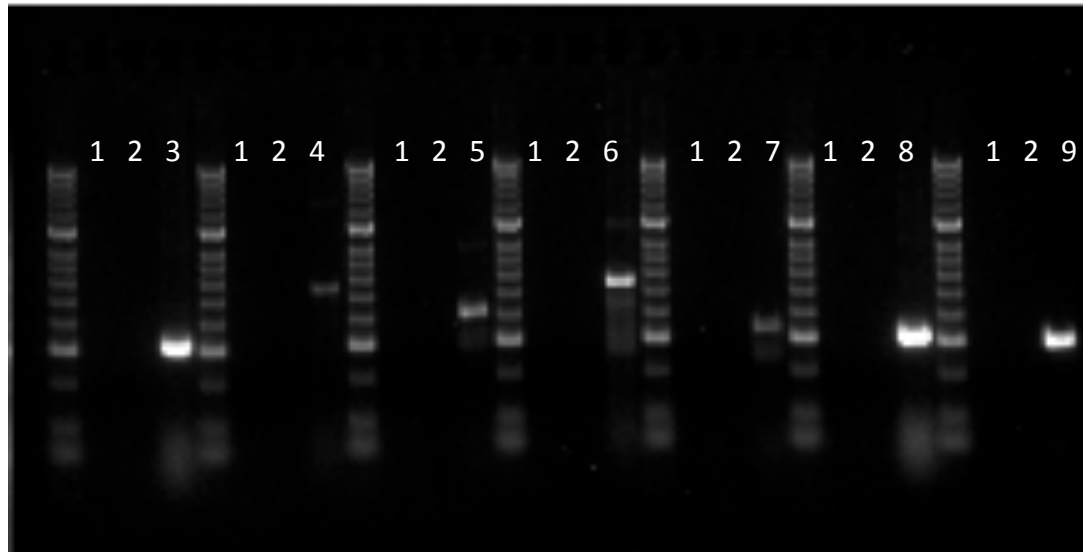

**Supplementary Figure 1C:** PCR using primer gene-F and the EBS-universal (EBS) with no template (1) and DNA extracts from *630Δerm* (2) and *cotA::CT555a* (3), *cotB::CT329a* (4), *cotCB::CT220s* (5), *cotD::CT302s* (6), *cotE::CT220s* (7), *cotE::CT1203s* (8) and *sodA::CT394s* (9).

EBS

5'-CGAAATTAGAACTTGCGTTCAGTAAAC-3'

$\alpha$  - CotA

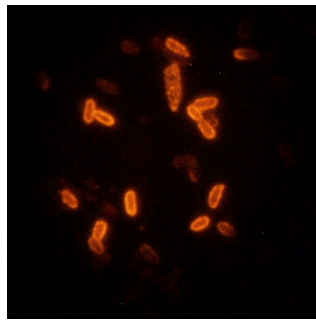

*630Δerm*

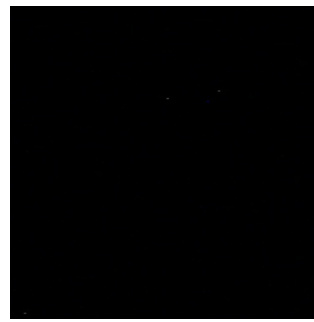

*cotA::CT555a*

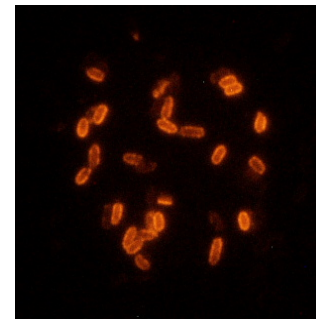

*cotA::CT555a*  
*complemented*

$\alpha$  - CotB

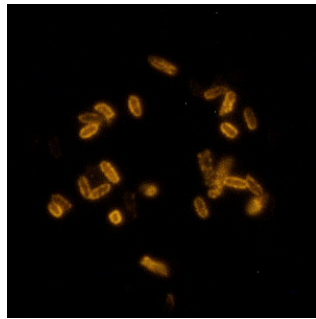

*630Δerm*

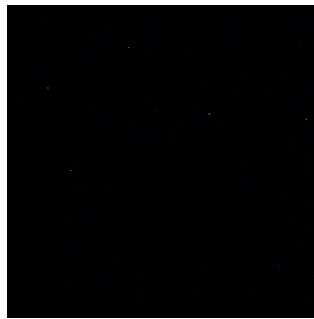

*cotB::CT329a*

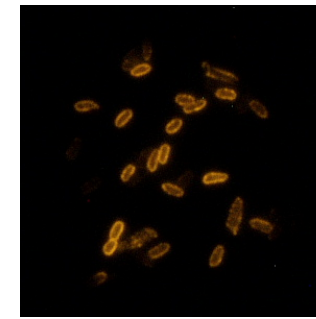

*cotB::CT329a*  
*complemented*

$\alpha$  - CotCB

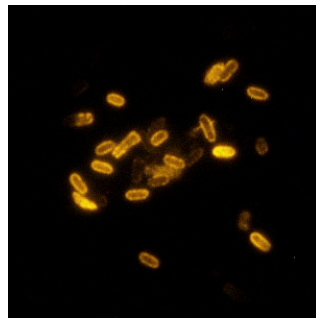

*630Δerm*

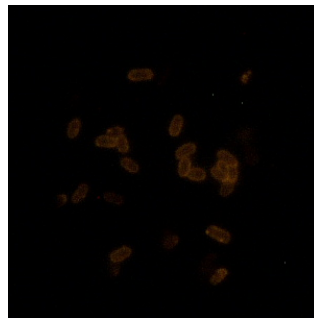

*cotCB::CT220s*

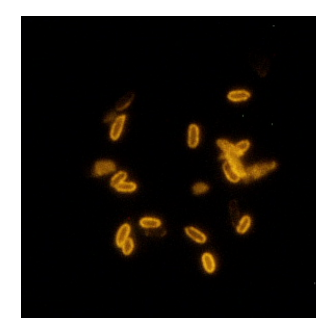

*cotCB::CT220s*  
*complemented*

**Supplementary Figure 2: Complementation of *cot* mutants using immunofluorescence microscopy**

$\alpha$  - CotD

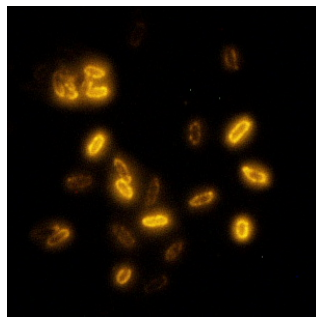

*630 $\Delta$ erm*

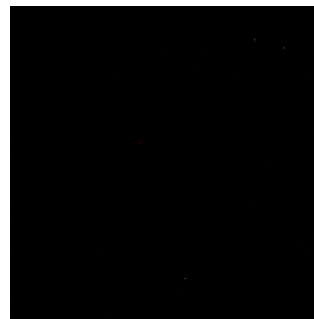

*cotD::CT302s*

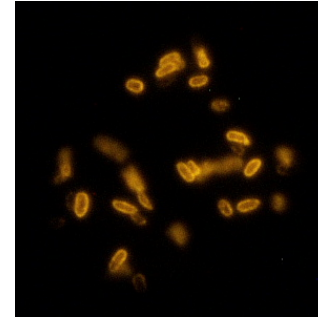

*cotD::CT302s*  
*complemented*

$\alpha$  - CotEN

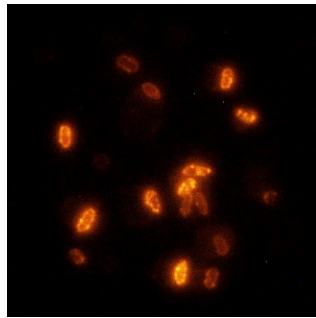

*630 $\Delta$ erm*

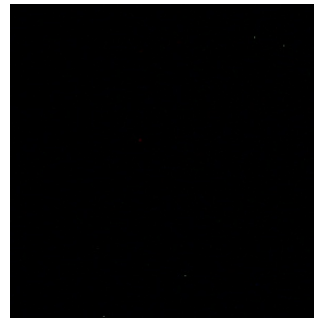

*cotE::CT220s*

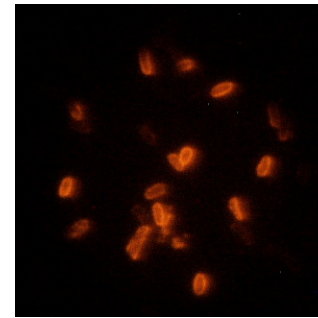

*cotE::CT220s*  
*complemented*

$\alpha$  - SodA

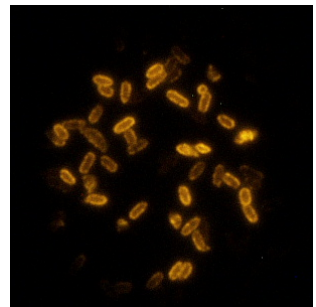

*630 $\Delta$ erm*

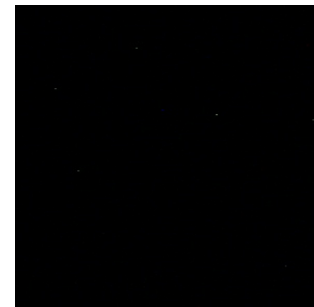

*sodA::CT394s*

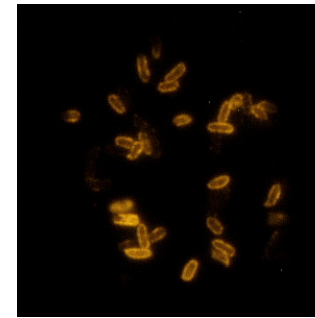

*sodA::CT394s*  
*complemented*

```

SodA      MKKKILIPVIMSLFIIISQCITSFAPTPENNKFKVKPLPYAYDALEPYIDKETMKLHHDKH 60
C.a.      -----MTASGGRCLQ--LLRRFHMAFEVPLPYDYNALEPYIDEATMHYHHDNH 48
C.p.      MKNNFLKHKKSPMPAYCGS---SSTKGEFGFKLPLDYPYDALEPSIDEETVKIHHDKH 57
          .          *          *:: ** * *::***** *:: *:: **::*

SodA      YQAYVDKLNAALEKYPELYNYSLCELLQNLDSLPKDIATTVRNNAGGAYNHKFFFDIMTP 120
C.a.      HQTYVTNLNNALANYPELQSKTIEELLGNLDAIPEAIRTAVRNNGGGHWNHTFFWEIMAP 108
C.p.      QQAYVDKLNKALEKHPELYGKSLYDILSNLDDMPEDIMADLVNQGQGGVYNHEFYWSILGK 117
          *::** *::** ** *::*** . :: *::* *** *:: * : : *::.** *::* *::.*:

SodA      EKT-IPSESLKEAIDRDFGSFEKFKQEFQKSALDVFGSGWAWLVATKDGKLSIMTTPNQD 179
C.a.      NAGGAPTGDLAALAAIDAAFSGSFDFAFKEKFKAAALGRFGSGWAWLVAAKDGSLSIMSTPNQD 168
C.p.      GCN-RPVAEIADAIDRDFGSFEFKEKFKQCGISTFGSGWAWLVSDKDGKLEIMSTKDQS 176
          * .: *** ****: **::*: ..:. *****: ***.*.*:*:*.

SodA      SPVSKNLTPIIGLDVWEHAYYLKYQNRNEYIDNWFNVVNWNGALENYKNLKSQD 234
C.a.      NPLMEGKTAILGLDVWEHAYYLKYQYKRAAYVDAWVNVVNWAKVADHYAAAKG-- 221
C.       SPISLGLIPILTMDVWEHAYYLKYQNRPEYIDYFFDIINWKKCEEYNNR---- 227
          .*: . .*: :***** * *:* *:::*** : *


```

SodA: from *C. difficile*

C.a.: *Chloroflexus aurantiacus J-10-fl*

C.p.: *Clostridium perfringens*

 Homologous with the Sod FeN super-family  
 Homologous with the Sod FeC super-family

Alignment Score

SodA- C.p. 51%

SodA - C.a. 52%

"\*" residues or nucleotides in that column are identical in all sequences in the alignment.  
 ":" conserved substitutions have been observed  
 "." semi-conserved substitutions are observed

### Supplementary Figure 3: Alignment of SodA (234 amino acids; 27kDa) from *C. difficile* with superoxide dismutase from other bacteria

MSLNRRELLERISEYQFACIELNLYLDNNPRDKKALDSYNRYCDKFTQAVC

DYESKYGALTNFGYESSEYPWSWISEPWPWDKSFYK

**Supplementary Figure 4: CotF.** (11 kDa; 88 amino acids, tyrosine -= 10.34%)



```

C.ca.      MFKHEKQLLK--DVKVERPNPQYAVLMQEQQLGGNGELKAAMQYISQSFRIKDPAIKDLF 58
C.ce.      MFKHEKQLLNQLEVKVERPNPQYAVLMQEQQLGGNGELKAAMQYLSQSFRIKQTIKDLF 60
CotG       MFKHDKALLK--EVKVERPNPQYAVLMQEQQLGGANGELKAAMQYLSQSFRIKDPQIKDLF 58
C.b.       MFKHEKPLLR--DVKVERPNPQYAVLMQEQQLGGANGELKAALQYLSQSFVRVKDPEIHDLF 58
          ****:* ** . :*****.*****:*.*****:* * :***

C.ca.      LDIGSEELSHMEMVAQTINLLNGHAVDFNTVTSGEIETHVLGGLSPVLTNSSGEPWTANY 118
C.ce.      LDIGTEELSHMEIVAETINLLNGHNVDNTSVGSGEIEETHVLTGLSPVLINSSGEPWTANY 120
CotG       LDIAAEELSHMEMVAQTINLLNGHDVDYNSVNTGEIETHVLTGLSPVLINSSGAPWTANY 118
C.b.       LDIAAEELSHMEMVAQTINLLNGHEVDYTKTPGGEIETHVLTGLAPGLINASGHPWTADY 118
          ***.:*****:*.***** ** .. ***** **:* * *:* ** ***:

C.ca.      VTVTGDVLVADLLSNIASEQRAKVVEYLYRQVNDKYVRETINFLLEEEAHNALFREARN 178
C.ce.      VTVTGDVLVADLLSNIASEQRAKVVEYLYRQINDKHVKNTIDFLLNREEAHNALFREARN 180
CotG       VTVTGDVLVADLLSNIASEQRAKVVEYLYRQIDDKYVKETIDFLLNREEAHNALFRDALN 178
C.b.       VNVTGDIAADLLSDIAAEQRAKVVEYLYRQINDKYVKETIDFLLNREEAHNALFREARN 178
          * .****: .****:*.*****:*****:*.***:*****:*****:***

C.ca.      NVKDTGSNKNFGVTEDESKLYFDLSTPG-RFYQNPNPTEPSFANPRKESELAKH 231
C.ce.      KIKDTGSNMDFGVTEDESRLYFDLSTPG-RYFENPNPTAPEFANPRR----- 225
CotG       KVKDTGSNRDFGVTEDESKLYFDLSTPGPNHDTKIDINPPSF EKPLKK----- 225
C.b.       KVQDRASNKDFGVTKDSRLYFDLSTPG-RYFDNPEPTPPSFKNPRENSRETTRS 231
          :::* .** :****:*.***** .. : : . *. * :* .

```

CotG: from *Clostridium difficile*

C.ca.: *Clostridium carboxidivorans* P7

C.ce.: *Clostridium cellulovorans* 743B

C.b.: *Clostridium beijerinckii* NCIMB 8052

"\*" residues or nucleotides in that column are identical in all sequences in the alignment.

":" conserved substitutions have been observed

"." semi-conserved substitutions are observed

Alignment score

CotG-C.ca. 80%

CotG-C.ce. 81%

CotG-C.b. 79%

## Supplementary Figure 5: Alignment of CotG (266 amino acids; 28 kDa) from *C. difficile* with manganese catalases from other bacteria

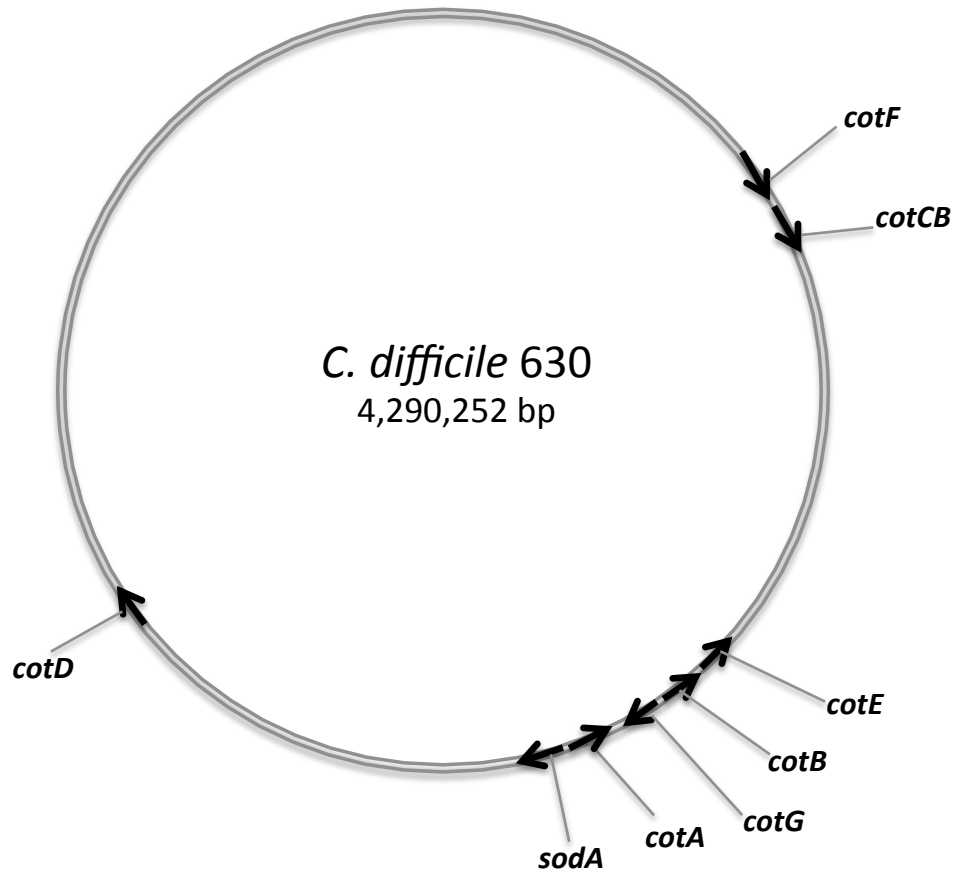

Supplementary Figure 6: Chromosomal location of spore coat genes
