# Supplementary material
Source: PubMed Central journal article supplement (PMC3624542)
Supplement: JB.02104-12_zjb999092500so2.pdf [file JB.02104-12_zjb999092500so2.pdf]

**Supplementary Table 1: Primers for construction of recombinant proteins and antibody production.**

|                                                   | Direction | Sequence <sup>1</sup> 5'-3'            | Restriction site |
|---------------------------------------------------|-----------|----------------------------------------|------------------|
| <i>rCotE<sup>C</sup></i> (332 residues; 36.8 kDa) |           |                                        |                  |
| CotE(C)-NcoI-F                                    | forward   | <b>GATCCATGGCTCCAATTGTAGCAG</b>        | <i>NcoI</i>      |
| CotE(C)-XhoI-R                                    | reverse   | <b>ATCCTCGAGGAATTGCCATAAATAC</b>       | <i>XhoI</i>      |
| <i>rCotE<sup>N</sup></i> (214 residues; 24.6 kDa) |           |                                        |                  |
| CotE(N)-NcoI-F                                    | forward   | <b>GGCCCATGGGCGTGATTTACATGCCAAATTT</b> | <i>NcoI</i>      |
| CotE(N)-XhoI-R                                    | reverse   | <b>CCGCTCGAGTGGTACAAAACATAAGTACCAG</b> | <i>XhoI</i>      |
| <i>rCotF</i> (88 residues; 10.5 kDa)              |           |                                        |                  |
| CotF-NcoI-F                                       | forward   | <b>GGCCCATGGGCATGTCATTAATAGAA</b>      | <i>NcoI</i>      |
| CotF-XhoI-R                                       | reverse   | <b>CCGCTCGAGTTTATAAAATGATTTGT</b>      | <i>XhoI</i>      |
| <i>rCotG</i> (266 residues; 25.3 kDa)             |           |                                        |                  |
| CotG-NcoI-F                                       | forward   | <b>GGCCCATGGGCATGTTTAAACAC</b>         | <i>NcoI</i>      |
| CotG-XhoI-R                                       | reverse   | <b>CCGCTCGAGTTTTTTTAAAGTTTTTC</b>      | <i>XhoI</i>      |
| <i>rSodA</i> (234 residues; 27.2 kDa)             |           |                                        |                  |
| SodA-NcoI-F                                       | forward   | <b>GGCCCATGGGCATGAAGAAA</b>            | <i>NcoI</i>      |
| SodA-XhoI-R                                       | reverse   | <b>CCGCTCGAGATCTTGAGATTTTAAATTTTT</b>  | <i>XhoI</i>      |

<sup>1</sup> Restriction site is in italics. Start codons are underlined and coding sequence is shown in bold.

**Supplementary Table 2: Complementation of the *cotA* mutant *cotA::CT555a***

| <b>Treatment</b> | <b>Strain</b>                                | <b>A<br/>Total CFU/ml<br/>(untreated)</b> | <b>B<br/>Resistant CFU/ml</b> | <b>% resistance<br/>(B/A X 100)</b> |
|------------------|----------------------------------------------|-------------------------------------------|-------------------------------|-------------------------------------|
| <b>Lysozyme</b>  | WT 630 $\Delta$ <i>erm</i>                   | 1.12 X 10 <sup>6</sup>                    | 1.09 X 10 <sup>6</sup>        | <b>97%</b>                          |
|                  | <i>cotA::CT555a</i>                          | 2.68 X 10 <sup>5</sup>                    | 8.6 X 10 <sup>4</sup>         | <b>32</b>                           |
|                  | <i>cotA::CT555a</i><br><i>pRPF185 (cotA)</i> | 1.15 X 10 <sup>6</sup>                    | 1.24 X 10 <sup>6</sup>        | <b>107</b>                          |
| <b>Ethanol</b>   | WT 630 $\Delta$ <i>erm</i>                   | 1.12 X 10 <sup>6</sup>                    | 9.8 X 10 <sup>5</sup>         | <b>88</b>                           |
|                  | <i>cotA::CT555a</i>                          | 2.68 X 10 <sup>5</sup>                    | 9.4 X 10 <sup>4</sup>         | <b>35</b>                           |
|                  | <i>cotA::CT555a</i><br><i>pRPF185 (cotA)</i> | 1.15 X 10 <sup>6</sup>                    | 1.04 X 10 <sup>6</sup>        | <b>90</b>                           |

**Supplementary Table 3: Resistance Assays<sup>1</sup>**

| Treatment                     | Mutant               | A<br>Total CFU/ml<br>(untreated)               | B<br>Resistant CFU/ml                           | %<br>resistance<br>(B/A X<br>100) | T-test<br>P-value         |
|-------------------------------|----------------------|------------------------------------------------|-------------------------------------------------|-----------------------------------|---------------------------|
| Heat<br>65°C                  | WT 630Δerm           | 1.3 X 10 <sup>6</sup> ± 1.11 X 10 <sup>5</sup> | 1.46 X 10 <sup>6</sup> ± 3.75 X 10 <sup>5</sup> | 113.4                             | 0.48951329                |
|                               | <i>cotA::CT555a</i>  | 2.9 X 10 <sup>5</sup> ± 9.68 X 10 <sup>4</sup> | 2.40 X 10 <sup>5</sup> ± 8.19 X 10 <sup>4</sup> | 83.1                              | 0.54166709                |
|                               | <i>cotB::CT329a</i>  | 1.8 X 10 <sup>6</sup> ± 3.76 X 10 <sup>5</sup> | 1.29 X 10 <sup>6</sup> ± 4.21 X 10 <sup>5</sup> | 72.3                              | 0.20431708                |
|                               | <i>cotCB::CT220s</i> | 1.5 X 10 <sup>6</sup> ± 1.83 X 10 <sup>5</sup> | 1.08 X 10 <sup>6</sup> ± 2.25 X 10 <sup>5</sup> | 73.4                              | 0.07945237                |
|                               | <i>cotD::CT302s</i>  | 1.0 X 10 <sup>6</sup> ± 1.15 X 10 <sup>5</sup> | 7.45 X 10 <sup>5</sup> ± 3.07 X 10 <sup>5</sup> | 73.3                              | 0.22516548                |
|                               | <i>cotE::CT220s</i>  | 1.5 X 10 <sup>6</sup> ± 4.44 X 10 <sup>5</sup> | 1.15 X 10 <sup>6</sup> ± 2.51 X 10 <sup>5</sup> | 76.8                              | 0.30194109                |
|                               | <i>cotE::CT1203s</i> | 1.1 X 10 <sup>6</sup> ± 3.08 X 10 <sup>5</sup> | 1.11 X 10 <sup>6</sup> ± 1.73 X 10 <sup>5</sup> | 104.2                             | 0.83639259                |
|                               | <i>sodA::CT394s</i>  | 5.0 X 10 <sup>5</sup> ± 5.27 X 10 <sup>4</sup> | 5.58 X 10 <sup>5</sup> ± 7.23 X 10 <sup>4</sup> | 111.7                             | 0.32200903                |
| Heat<br>80°C                  | WT 630Δerm           | 1.3 X 10 <sup>6</sup> ± 1.11 X 10 <sup>5</sup> | 4.77 X 10 <sup>4</sup> ± 3.97 X 10 <sup>4</sup> | 3.7                               | 5.401 X 10 <sup>-5</sup>  |
|                               | <i>cotA::CT555a</i>  | 2.9 X 10 <sup>5</sup> ± 9.68 X 10 <sup>4</sup> | 5.78 X 10 <sup>3</sup> ± 2.22 X 10 <sup>3</sup> | 2.0                               | 0.00717702                |
|                               | <i>cotB::CT329a</i>  | 1.8 X 10 <sup>6</sup> ± 3.76 X 10 <sup>5</sup> | 5.40 X 10 <sup>4</sup> ± 3.15 X 10 <sup>4</sup> | 3.0                               | 0.00135718                |
|                               | <i>cotCB::CT220s</i> | 1.5 X 10 <sup>6</sup> ± 1.83 X 10 <sup>5</sup> | 6.80 X 10 <sup>4</sup> ± 2.49 X 10 <sup>4</sup> | 4.6                               | 0.00019144                |
|                               | <i>cotD::CT302s</i>  | 1.0 X 10 <sup>6</sup> ± 1.15 X 10 <sup>5</sup> | 4.40 X 10 <sup>4</sup> ± 9.35 X 10 <sup>3</sup> | 4.3                               | 0.00012955                |
|                               | <i>cotE::CT220s</i>  | 1.5 X 10 <sup>6</sup> ± 4.44 X 10 <sup>5</sup> | 4.30 X 10 <sup>4</sup> ± 1.53 X 10 <sup>3</sup> | 2.9                               | 0.00473811                |
|                               | <i>cotE::CT1203s</i> | 1.1 X 10 <sup>6</sup> ± 3.08 X 10 <sup>5</sup> | 3.22 X 10 <sup>4</sup> ± 1.52 X 10 <sup>4</sup> | 3.0                               | 0.00440594                |
|                               | <i>sodA::CT394s</i>  | 5.0 X 10 <sup>5</sup> ± 5.27 X 10 <sup>4</sup> | 3.04 X 10 <sup>4</sup> ± 1.75 X 10 <sup>4</sup> | 6.1                               | 0.0001262                 |
| Virkon                        | WT 630Δerm           | 1.3 X 10 <sup>6</sup> ± 1.11 X 10 <sup>5</sup> | 1.89 X 10 <sup>1</sup> ± 1.84 X 10 <sup>1</sup> | >0.0                              | 3.6627 X 10 <sup>-5</sup> |
|                               | <i>cotA::CT555a</i>  | 2.9 X 10 <sup>5</sup> ± 9.68 X 10 <sup>4</sup> | 1.11 X 10 <sup>1</sup> ± 1.92 X 10 <sup>1</sup> | >0.0                              | 0.00667414                |
|                               | <i>cotB::CT329a</i>  | 1.8 X 10 <sup>6</sup> ± 3.76 X 10 <sup>5</sup> | 5.56 X 10 <sup>0</sup> ± 1.92 X 10 <sup>0</sup> | >0.0                              | 0.00119123                |
|                               | <i>cotCB::CT220s</i> | 1.5 X 10 <sup>6</sup> ± 1.83 X 10 <sup>5</sup> | 667 X 10 <sup>0</sup> ± 3.33 X 10 <sup>0</sup>  | >0.0                              | 0.00015334                |
|                               | <i>cotD::CT302s</i>  | 1.0 X 10 <sup>6</sup> ± 1.15 X 10 <sup>5</sup> | 1.47 X 10 <sup>2</sup> ± 1.93 X 10 <sup>2</sup> | >0.0                              | 0.00010749                |
|                               | <i>cotE::CT220s</i>  | 1.5 X 10 <sup>6</sup> ± 4.44 X 10 <sup>5</sup> | 2.44 X 10 <sup>1</sup> ± 1.84 X 10 <sup>1</sup> | >0.0                              | 0.00426176                |
|                               | <i>cotE::CT1203s</i> | 1.1 X 10 <sup>6</sup> ± 3.08 X 10 <sup>5</sup> | 3.33 X 10 <sup>0</sup> ± 3.33 X 10 <sup>0</sup> | >0.0                              | 0.00392077                |
|                               | <i>sodA::CT394s</i>  | 5.0 X 10 <sup>5</sup> ± 5.27 X 10 <sup>4</sup> | 4.44 X 10 <sup>0</sup> ± 1.92 X 10 <sup>0</sup> | >0.0                              | 8.0155 X 10 <sup>-5</sup> |
| H <sub>2</sub> O <sub>2</sub> | WT 630Δerm           | 1.3 X 10 <sup>6</sup> ± 1.11 X 10 <sup>5</sup> | 2.00 X 10 <sup>1</sup> ± 3.46 X 10 <sup>1</sup> | >0.0                              | 3.6627 X 10 <sup>-5</sup> |
|                               | <i>cotA::CT555a</i>  | 2.9 X 10 <sup>5</sup> ± 9.68 X 10 <sup>4</sup> | 1.01 X 10 <sup>2</sup> ± 4.17 X 10 <sup>1</sup> | >0.0                              | 0.00668156                |
|                               | <i>cotB::CT329a</i>  | 1.8 X 10 <sup>6</sup> ± 3.76 X 10 <sup>5</sup> | 9.56 X 10 <sup>1</sup> ± 3.95 X 10 <sup>1</sup> | >0.0                              | 0.00119146                |
|                               | <i>cotCB::CT220s</i> | 1.5 X 10 <sup>6</sup> ± 1.83 X 10 <sup>5</sup> | 1.07 X 10 <sup>2</sup> ± 5.77 X 10 <sup>0</sup> | >0.0                              | 0.00015338                |
|                               | <i>cotD::CT302s</i>  | 1.0 X 10 <sup>6</sup> ± 1.15 X 10 <sup>5</sup> | 1.87 X 10 <sup>2</sup> ± 1.40 X 10 <sup>2</sup> | >0.0                              | 0.00010751                |
|                               | <i>cotE::CT220s</i>  | 1.5 X 10 <sup>6</sup> ± 4.44 X 10 <sup>5</sup> | 9.44 X 10 <sup>1</sup> ± 6.38 X 10 <sup>1</sup> | >0.0                              | 0.00426248                |
|                               | <i>cotE::CT1203s</i> | 1.1 X 10 <sup>6</sup> ± 3.08 X 10 <sup>5</sup> | 2.56 X 10 <sup>1</sup> ± 3.56 X 10 <sup>1</sup> | >0.0                              | 0.00392107                |
|                               | <i>sodA::CT394s</i>  | 5.0 X 10 <sup>5</sup> ± 5.27 X 10 <sup>4</sup> | 2.67 X 10 <sup>1</sup> ± 1.15 X 10 <sup>1</sup> | >0.0                              | 8.0169 X 10 <sup>-5</sup> |
| Chloroform                    | WT 630Δerm           | 1.3 X 10 <sup>6</sup> ± 1.11 X 10 <sup>5</sup> | 1.05 X 10 <sup>6</sup> ± 5.01 X 10 <sup>4</sup> | 81.7                              | 0.02873133                |
|                               | <i>cotA::CT555a</i>  | 2.9 X 10 <sup>5</sup> ± 9.68 X 10 <sup>4</sup> | 2.37 X 10 <sup>5</sup> ± 2.47 X 10 <sup>4</sup> | 82.0                              | 0.41746029                |
|                               | <i>cotB::CT329a</i>  | 1.8 X 10 <sup>6</sup> ± 3.76 X 10 <sup>5</sup> | 1.43 X 10 <sup>6</sup> ± 4.93 X 10 <sup>4</sup> | 80.3                              | 0.18309146                |
|                               | <i>cotCB::CT220s</i> | 1.5 X 10 <sup>6</sup> ± 1.83 X 10 <sup>5</sup> | 1.17 X 10 <sup>6</sup> ± 1.19 X 10 <sup>5</sup> | 79.4                              | 0.07353679                |
|                               | <i>cotD::CT302s</i>  | 1.0 X 10 <sup>6</sup> ± 1.15 X 10 <sup>5</sup> | 8.03 X 10 <sup>5</sup> ± 1.89 X 10 <sup>5</sup> | 79.0                              | 0.17095862                |
|                               | <i>cotE::CT220s</i>  | 1.5 X 10 <sup>6</sup> ± 4.44 X 10 <sup>5</sup> | 1.17 X 10 <sup>6</sup> ± 6.54 X 10 <sup>4</sup> | 78.1                              | 0.27356593                |
|                               | <i>cotE::CT1203s</i> | 1.1 X 10 <sup>6</sup> ± 3.08 X 10 <sup>5</sup> | 9.22 X 10 <sup>5</sup> ± 4.58 X 10 <sup>5</sup> | 86.5                              | 0.67629992                |
|                               | <i>sodA::CT394s</i>  | 5.0 X 10 <sup>5</sup> ± 5.27 X 10 <sup>4</sup> | 4.12 X 10 <sup>5</sup> ± 1.50 X 10 <sup>5</sup> | 82.3                              | 0.38915901                |
| Toluene                       | WT 630Δerm           | 1.3 X 10 <sup>6</sup> ± 1.11 X 10 <sup>5</sup> | 1.11 X 10 <sup>6</sup> ± 1.10 X 10 <sup>5</sup> | 86.8                              | 0.13216629                |
|                               | <i>cotA::CT555a</i>  | 2.9 X 10 <sup>5</sup> ± 9.68 X 10 <sup>4</sup> | 2.40 X 10 <sup>5</sup> ± 2.18 X 10 <sup>4</sup> | 83.1                              | 0.44261775                |
|                               | <i>cotB::CT329a</i>  | 1.8 X 10 <sup>6</sup> ± 3.76 X 10 <sup>5</sup> | 1.48 X 10 <sup>6</sup> ± 4.55 X 10 <sup>5</sup> | 83.0                              | 0.42362055                |
|                               | <i>cotCB::CT220s</i> | 1.5 X 10 <sup>6</sup> ± 1.83 X 10 <sup>5</sup> | 1.31 X 10 <sup>6</sup> ± 1.22 X 10 <sup>5</sup> | 88.7                              | 0.25890154                |
|                               | <i>cotD::CT302s</i>  | 1.0 X 10 <sup>6</sup> ± 1.15 X 10 <sup>5</sup> | 9.40 X 10 <sup>5</sup> ± 1.95 X 10 <sup>5</sup> | 92.5                              | 0.58955027                |
|                               | <i>cotE::CT220s</i>  | 1.5 X 10 <sup>6</sup> ± 4.44 X 10 <sup>5</sup> | 1.43 X 10 <sup>6</sup> ± 2.11 X 10 <sup>5</sup> | 95.2                              | 0.81295421                |
|                               | <i>cotE::CT1203s</i> | 1.1 X 10 <sup>6</sup> ± 3.08 X 10 <sup>5</sup> | 1.00 X 10 <sup>6</sup> ± 7.01 X 10 <sup>4</sup> | 94.2                              | 0.7524454                 |
|                               | <i>sodA::CT394s</i>  | 5.0 X 10 <sup>5</sup> ± 5.27 X 10 <sup>4</sup> | 3.98 X 10 <sup>5</sup> ± 1.02 X 10 <sup>5</sup> | 79.7                              | 0.19851922                |
| Lysozyme                      | WT 630Δerm           | 1.3 X 10 <sup>6</sup> ± 1.11 X 10 <sup>5</sup> | 1.17 X 10 <sup>6</sup> ± 1.34 X 10 <sup>5</sup> | 91.4                              | 0.33532164                |
|                               | <i>cotA::CT555a</i>  | 2.9 X 10 <sup>5</sup> ± 9.68 X 10 <sup>4</sup> | 7.50 X 10 <sup>4</sup> ± 2.65 X 10 <sup>4</sup> | 26.0                              | 0.0210438                 |

|         |                            |                                        |                                         |      |            |
|---------|----------------------------|----------------------------------------|-----------------------------------------|------|------------|
|         | <i>cotB::CT329a</i>        | $1.8 \times 10^6 \pm 3.76 \times 10^5$ | $1.61 \times 10^6 \pm 3.03 \times 10^5$ | 90.5 | 0.57445344 |
|         | <i>cotCB::CT220s</i>       | $1.5 \times 10^6 \pm 1.83 \times 10^5$ | $1.35 \times 10^6 \pm 1.45 \times 10^5$ | 91.8 | 0.422989   |
|         | <i>cotD::CT302s</i>        | $1.0 \times 10^6 \pm 1.15 \times 10^5$ | $9.22 \times 10^5 \pm 2.36 \times 10^4$ | 90.7 | 0.23484143 |
|         | <i>cotE::CT220s</i>        | $1.5 \times 10^6 \pm 4.44 \times 10^5$ | $1.37 \times 10^6 \pm 2.75 \times 10^4$ | 91.7 | 0.65171887 |
|         | <i>cotE::CT1203s</i>       | $1.1 \times 10^6 \pm 3.08 \times 10^5$ | $9.55 \times 10^5 \pm 3.65 \times 10^5$ | 89.7 | 0.71046252 |
|         | <i>sodA::CT394s</i>        | $5.0 \times 10^5 \pm 5.27 \times 10^4$ | $4.75 \times 10^5 \pm 1.42 \times 10^5$ | 95.0 | 0.78886517 |
| Ethanol | WT 630 $\Delta$ <i>erm</i> | $1.3 \times 10^6 \pm 1.11 \times 10^5$ | $1.15 \times 10^6 \pm 5.77 \times 10^4$ | 89.5 | 0.1348907  |
|         | <i>cotA::CT555a</i>        | $2.9 \times 10^5 \pm 9.68 \times 10^4$ | $8.50 \times 10^4 \pm 3.12 \times 10^4$ | 29.4 | 0.02560514 |
|         | <i>cotB::CT329a</i>        | $1.8 \times 10^6 \pm 3.76 \times 10^5$ | $1.63 \times 10^6 \pm 1.12 \times 10^5$ | 91.2 | 0.52672221 |
|         | <i>cotCB::CT220s</i>       | $1.5 \times 10^6 \pm 1.83 \times 10^5$ | $1.34 \times 10^6 \pm 2.73 \times 10^5$ | 90.8 | 0.51563281 |
|         | <i>cotD::CT302s</i>        | $1.0 \times 10^6 \pm 1.15 \times 10^5$ | $9.45 \times 10^5 \pm 2.05 \times 10^5$ | 93.0 | 0.62562571 |
|         | <i>cotE::CT220s</i>        | $1.5 \times 10^6 \pm 4.44 \times 10^5$ | $1.35 \times 10^6 \pm 1.18 \times 10^5$ | 90.1 | 0.60558119 |
|         | <i>cotE::CT1203s</i>       | $1.1 \times 10^6 \pm 3.08 \times 10^5$ | $9.38 \times 10^5 \pm 6.03 \times 10^4$ | 88.1 | 0.52335273 |
|         | <i>sodA::CT394s</i>        | $5.0 \times 10^5 \pm 5.27 \times 10^4$ | $3.97 \times 10^5 \pm 8.01 \times 10^4$ | 79.3 | 0.13519452 |

<sup>1</sup>Resistance assays were performed three times independently.
